# Supplementary material
Source: PubMed Central journal article supplement (PMC3589238)
Supplement: supp_112.104802_104802_Zama_Suppl_Figure1.pdf [file supp_112.104802_104802_Zama_Suppl_Figure1.pdf]

**Supplemental Figure S1.** Canonical pathways common to all treatments wherein significant hypermethylation was observed (threshold  $P < 0.05$ ).

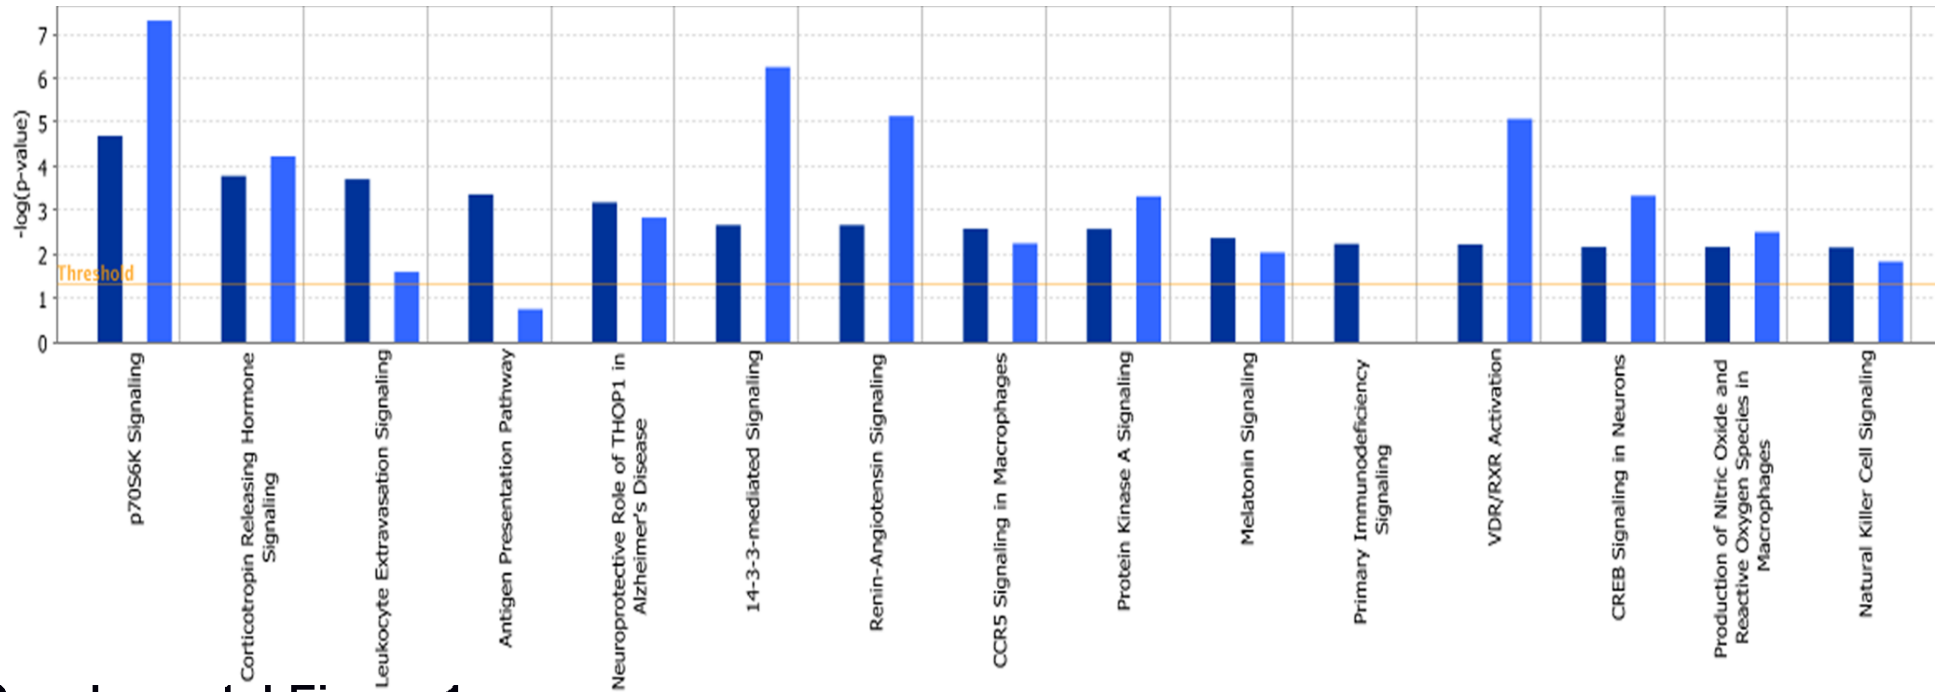

**Supplemental Figure 1**
