# Supplementary material
Source: PubMed Central journal article supplement (PMC3589238)
Supplement: supp_112.104802_104802_Zama_Suppl_Table1_resubmission.pdf [file supp_112.104802_104802_Zama_Suppl_Table1_resubmission.pdf]

**Supplemental Table S1.** Genes examined in TLDA analysis.

| <b>Gene Symbol</b> | <b>Refseq #</b> | <b>Official Full Name</b>                                                                                      |
|--------------------|-----------------|----------------------------------------------------------------------------------------------------------------|
| Accn3              | NM_173135       | Amiloride-sensitive cation channel 3                                                                           |
| Acpp               | NM_020072       | Acid phosphatase, prostate                                                                                     |
| Actb               | NM_031144       | Actin, beta                                                                                                    |
| Adrb2              | NM_012492       | Adrenergic, beta-2-, receptor, surface                                                                         |
| Aldh3a1            | NM_031972       | Aldehyde dehydrogenase 3 family, member A1                                                                     |
| Ar                 | NM_012502       | Androgen receptor                                                                                              |
| Arnt               | NM_012780       | Aryl hydrocarbon receptor nuclear translocator                                                                 |
| Atp5b              | NM_134364       | ATP synthase, H <sup>+</sup> transporting, mitochondrial F1 complex, beta polypeptide                          |
| B2m                | NM_012512       | Beta-2 microglobulin                                                                                           |
| Bdkrb1             | NM_030851       | Bradykinin receptor B1                                                                                         |
| Cav1               | NM_031556       | Caveolin 1, caveolae protein                                                                                   |
| Cdkn1a             | NM_080782       | Cyclin-dependent kinase inhibitor 1A (p21, Cip1)                                                               |
| Cdkn1b             | NM_031762       | Cyclin-dependent kinase inhibitor 1B                                                                           |
| Cebpa              | NM_012524       | CCAAT/enhancer binding protein (C/EBP), alpha                                                                  |
| Cebpb              | NM_024125       | CCAAT/enhancer binding protein (C/EBP), beta                                                                   |
| Cxcr4              | NM_022205       | Chemokine (C-X-C motif) receptor 4                                                                             |
| Cyp11a1            | NM_017286       | Cytochrome P450, family 11, subfamily a, polypeptide 1                                                         |
| Cyp26b1            | NM_181087       | Cytochrome P450, family 26, subfamily b, polypeptide 1                                                         |
| Dbp                | NM_012543       | D site of albumin promoter (albumin D-box) binding protein                                                     |
| Dgkz               | NM_031143       | Diacylglycerol kinase zeta                                                                                     |
| Dnmt1              | NM_053354       | DNA (cytosine-5-)-methyltransferase 1                                                                          |
| Dnmt3a             | NM_001003958    | DNA (cytosine-5-)-methyltransferase 3 alpha                                                                    |
| Dnmt3b             | NM_001003959    | DNA methyltransferase 3B                                                                                       |
| Drd1a              | NM_012546       | Dopamine receptor D1A                                                                                          |
| Dusp1              | NM_053769       | Dual specificity phosphatase 1                                                                                 |
| Edn1               | NM_012548       | Endothelin 1                                                                                                   |
| Egr2               | NM_053633       | Early growth response 2                                                                                        |
| Eif4e              | NM_053974       | Eukaryotic translation initiation factor 4E                                                                    |
| ErbB2              | NM_017003       | V-erb-b2 erythroblastic leukemia viral oncogene homolog 2, neuro/glioblastoma derived oncogene homolog (avian) |
| Esr1               | NM_012689       | Estrogen receptor 1(ER alpha)                                                                                  |
| Esr2               | NM_012754       | Estrogen receptor 2 (ER beta)                                                                                  |
| Fgfr1              | NM_024146       | Fibroblast growth factor receptor 1                                                                            |
| Foxo3              | XM_215421       | Forkhead box O3                                                                                                |
| Fshr               | NM_199237       | Follicle stimulating hormone receptor                                                                          |
| Fst                | NM_012561       | Follistatin                                                                                                    |
| Fyn                | NM_012755       | FYN oncogene related to SRC, FGR, YES                                                                          |
| Gabbr1             | NM_031028       | Gamma-aminobutyric acid (GABA) B receptor 1                                                                    |
| Gna12              | NM_031034       | Guanine nucleotide binding protein, alpha 12                                                                   |
| Gnas               | NM_019132       | GNAS complex locus                                                                                             |
| Hbegf              | NM_012945       | Heparin-binding EGF-like growth factor                                                                         |
| Hmox1              | NM_012580       | Heme oxygenase (decycling) 1                                                                                   |
| Hnf1a              | NM_012669       | HNF1 homeobox A                                                                                                |
| Hras               | XM_001062236    | Harvey rat sarcoma virus oncogene                                                                              |
| Hsd17b7            | NM_017235       | Hydroxysteroid (17-beta) dehydrogenase 7                                                                       |
| Hsd3b              | NM_001042619    | 3 beta-hydroxysteroid dehydrogenase/delta-5-delta-4 isomerase type II                                          |
| Hsp90aa1           | NM_175761       | Heat shock protein 90, alpha (cytosolic), class A member 1                                                     |
| Ifngr2             | XM_340967       | Interferon gamma receptor 2                                                                                    |
| Igf1               | NM_178866       | Insulin-like growth factor 1                                                                                   |
| Igf1r              | NM_052807       | Insulin-like growth factor 1 receptor                                                                          |
| Igfals             | NM_053329       | Insulin-like growth factor binding protein, acid labile subunit                                                |
| Insr               | NM_017071       | Insulin receptor                                                                                               |
| Irs1               | NM_012969       | Insulin receptor substrate 1                                                                                   |
| Klf4               | NM_053713       | Kruppel-like factor 4 (gut)                                                                                    |
| Lcn2               | NM_130741       | Lipocalin 2                                                                                                    |
| Lhcgr              | NM_012978       | Luteinizing hormone/choriogonadotropin receptor                                                                |

|          |              |                                                                       |
|----------|--------------|-----------------------------------------------------------------------|
| Lpar1    | NM_053936    | Lysophosphatidic acid receptor 1                                      |
| Magi2    | NM_053621    | Membrane associated guanylate kinase, WW and PDZ domain containing 2  |
| Max      | NM_022210    | MYC associated factor X                                               |
| Mecp2    | NM_022673    | Methyl CpG binding protein 2                                          |
| Mmp10    | NM_133514    | Matrix metalloproteinase 10                                           |
| Nck1     | XM_217246    | NCK adaptor protein 1                                                 |
| Ncoa1    | XM_233944    | Nuclear receptor coactivator 1                                        |
| Nos2     | NM_012611    | Nitric oxide synthase 2, inducible                                    |
| Nr4a3    | NM_017352    | Nuclear receptor subfamily 4, group A, member 3                       |
| Ntrk2    | NM_012731    | Neurotrophic tyrosine kinase, receptor, type 2                        |
| Onecut1  | NM_022671    | One cut homeobox 1                                                    |
| Pappa    | XM_233037    | Pregnancy-associated plasma protein A                                 |
| Pard6a   | NM_001003653 | Par-6 (partitioning defective 6,) homolog alpha (C. elegans)          |
| Pcp4     | NM_013002    | Purkinje cell protein 4                                               |
| Pik3r1   | NM_013005    | Phosphoinositide-3-kinase, regulatory subunit 1 (alpha)               |
| Plcb1    | XM_342524    | Phospholipase C, beta 1 (phosphoinositide-specific)                   |
| Plcd1    | NM_017035    | Phospholipase C, delta 1                                              |
| Pou4f2   | XM_344756    | POU domain, class 4, transcription factor 2                           |
| Ppard    | NM_013141    | Peroxisome proliferator-activated receptor delta                      |
| Ppargc1a | NM_031347    | Peroxisome proliferator-activated receptor gamma, coactivator 1 alpha |
| 18S rRNA | M11188.1     | Positive PCR control                                                  |
| Prkca    | XM_343975    | Protein kinase C, alpha                                               |
| Prkcb    | NM_012713    | Protein kinase C, beta                                                |
| Prlr     | NM_012630    | Prolactin receptor                                                    |
| Ptgds    | NM_013015    | Prostaglandin D2 synthase (brain)                                     |
| Ptger1   | NM_013100    | Prostaglandin E receptor 1 (subtype EP1)                              |
| Runx2    | NM_346016    | Runt related transcription factor 2                                   |
| Sgk1     | NM_019232    | Serum/glucocorticoid regulated kinase 1                               |
| Slc27a1  | NM_053580    | Solute carrier family 27 (fatty acid transporter), member 1           |
| Smad2    | NM_019191    | SMAD family member 2                                                  |
| Socs1    | NM_145879    | Suppressor of cytokine signaling 1                                    |
| Sstr2    | NM_019348    | Somatostatin receptor 2                                               |
| Sstr3    | NM_133522    | Somatostatin receptor 3                                               |
| Stat5a   | NM_017064    | Signal transducer and activator of transcription 5A                   |
| Tgfbr1   | NM_012775    | Transforming growth factor, beta receptor 1                           |
| Tgm2     | NM_019386    | Transglutaminase 2, C polypeptide                                     |
| Th       | NM_012740    | Tyrosine hydroxylase                                                  |
| Tp73     | XM_342992    | Tumor protein p73                                                     |
| Tubb6    | NM_001025675 | Tubulin, beta 6                                                       |
| Usf2     | NM_031139    | Upstream transcription factor 2                                       |
| Gper     | NM_171104    | G-protein coupled receptor 30                                         |

### Supplemental Table 1
