# Supplementary material
Source: PubMed Central journal article supplement (PMC3589238)
Supplement: supp_112.104802_104802_Zama_Suppl_Table2.pdf [file supp_112.104802_104802_Zama_Suppl_Table2.pdf]

| Altered in both PND 7 and 60 |      |       |                       |                |         |         |      |
|------------------------------|------|-------|-----------------------|----------------|---------|---------|------|
|                              | Dose | Fold  | P value               | Fold           | P Value |         |      |
|                              |      | PND 7 |                       | PND 60         |         |         |      |
| <b>Cyp11b1</b>               | low  | 0.68  | ns                    | 0.82           | ns      |         |      |
|                              | high | 2.42  | 0.05                  | 1.76           | 0.05    |         |      |
| <b>Hras</b>                  | low  | 0.80  | ns                    | 1.38           | ns      |         |      |
|                              | high | 2.13  | 0.05                  | 1.57           | 0.05    |         |      |
| <b>Hsd17b7</b>               | low  | 0.60  | ns                    | 1.03           | ns      |         |      |
|                              | high | 1.69  | 0.05                  | 2.44           | 0.01    |         |      |
| <b>Igf1r</b>                 | low  | 0.73  | ns                    | 1.20           | ns      |         |      |
|                              | high | 2.13  | 0.05                  | 1.82           | 0.05    |         |      |
| <b>Max</b>                   | low  | 0.55  | ns                    | 1.67           | ns      |         |      |
|                              | high | 1.32  | 0.00                  | 1.92           | 0.05    |         |      |
| <b>Pik3r1</b>                | low  | 1.40  | ns                    | 2.24           | 0.05    |         |      |
|                              | high | 2.06  | 0.05                  | 2.80           | 0.01    |         |      |
| Altered in PND 60 only       |      |       | Altered in PND 7 only |                |         |         |      |
|                              | Dose | Fold  | P value               | Dose           | Fold    | P value |      |
| <b>Arnt</b>                  | low  | 1.28  | ns                    | <b>Pgr</b>     | low     | 1.63    | ns   |
|                              | high | 2.02  | 0.05                  |                | high    | 1.48    | 0.05 |
| <b>Atp5b</b>                 | low  | 1.45  | ns                    | <b>Igf1bp5</b> | low     | 0.75    | ns   |
|                              | high | 2.13  | 0.01                  |                | high    | 2.12    | 0.05 |
| <b>Cebpa</b>                 | low  | 1.32  | ns                    | <b>Cyp26b1</b> | low     | 0.64    | ns   |
|                              | high | 1.84  | 0.05                  |                | high    | 0.42    | 0.05 |
| <b>Dnmt3a</b>                | low  | 1.45  | ns                    | <b>Prkcb</b>   | low     | 0.46    | ns   |
|                              | high | 2.03  | 0.01                  |                | high    | 1.53    | 0.01 |
| <b>Foxo3</b>                 | low  | 1.32  | ns                    | <b>Runx2</b>   | low     | 0.91    | ns   |
|                              | high | 1.59  | 0.05                  |                | high    | 2.96    | 0.05 |
| <b>Fst</b>                   | low  | 0.98  | ns                    | <b>Cdkn1a</b>  | low     | 1.63    | 0.05 |
|                              | high | 2.08  | 0.05                  |                | high    | 1.48    | 0.01 |
| <b>Gnas</b>                  | low  | 1.40  | ns                    | <b>Cav1</b>    | low     | 1.78    | 0.05 |
|                              | high | 1.64  | 0.05                  |                | high    | 1.21    | ns   |
| <b>Insr</b>                  | low  | 1.42  | ns                    |                |         |         |      |
|                              | high | 1.77  | 0.05                  |                |         |         |      |
| <b>Prkca</b>                 | low  | 1.66  | ns                    |                |         |         |      |
|                              | high | 2.30  | 0.05                  |                |         |         |      |
| <b>Slc27a1</b>               | low  | 1.11  | ns                    |                |         |         |      |
|                              | high | 2.25  | 0.01                  |                |         |         |      |
| <b>Smad2</b>                 | low  | 1.59  | ns                    |                |         |         |      |
|                              | high | 1.79  | 0.05                  |                |         |         |      |
| <b>Lpar1</b>                 | low  | 1.88  | 0.05                  |                |         |         |      |
|                              | high | 1.25  | ns                    |                |         |         |      |

**Supplemental Table S2.** Normalized gene expression of candidate genes that had significant decrease in expression in high-dose MXC treated ovaries at PND 60. The control group was used as the calibrator group (Data Assist Software, Applied Bio Systems) and the false discovery rate calculated (Benjamini-Hochberg method,  $P < 0.05$ ). A secondary t-test (two-tailed, nonparametric) was performed and  $P$  values reported as shown above.

Supplemental Table 2
